1 **Double-transmembrane domain reduces fusion rate by increasing lipid-protein mismatch**

2

3 B. Bu<sup>1</sup>, Z. Tian<sup>2,3</sup>, D. Li<sup>4,\*</sup>, K. Zhang<sup>5</sup>, B. Ji<sup>4</sup>, J. Diao<sup>2,\*</sup>

4

5

6

7

8

9

10

11

12

13

14

15

16

17 **ABSTRACT:** Membrane fusion mediated by Soluble N-ethylmaleimide-sensitive factor activating  
18 protein receptor (SNARE) proteins is an important cellular process. For neuronal SNAREs, the single  
19 transmembrane domain has been proposed to pass zippering energy to membranes for inducing fast  
20 fusion. In contrast, the SNARE protein, syntaxin 17, for membrane fusion involved in autophagosome  
21 maturation contains an unusual V-shape double-transmembrane domain that may influence its capability  
22 to pass energy. Here, we showed that this double-transmembrane domain significantly reduces fusion  
23 with an in vitro reconstitution system. Through theoretic modelling, we found that this V-shape

24 double-transmembrane domain increases lipid-protein mismatch, which reduces the energy transduction  
25 for fusion. Moreover, our model also revealed the involvement of 2-3 SNAREs in a general fusion  
26 process.

27

28 **RUNNING TITLE:** Transmembrane domain in fusion

29

30 **SIGNIFICANT STATEMENT:** Soluble N-ethylmaleimide-sensitive factor activating protein receptors  
31 (SNAREs) serve as the molecular machine to mediate membrane fusion. The zipper formation of core  
32 structure extending to membranes by two single transmembrana domains (TMDs) is the main driving  
33 force of membrane fusion. The role of TMD in fusion is unclear. By adding an extra TMD, we found  
34 that the hydrophobic mismatch effect between the thickness of the membrane and the length of TMDs  
35 plays an important role in regulating fusion.

36

## 37 INTRODUCTION

38 As a ubiquitous cellular process, membrane fusion plays a decisive role in the neurotransmission, drug  
39 delivery, exo- and endocytosis (1-4). Soluble N-ethylmaleimide-sensitive factor activating protein  
40 receptors (SNAREs) serve as the molecular machine to mediate neurotransmission and other fusion  
41 process (5, 6). The core structure of neuronal SNAREs is composed of synaptobrevin-2 (Syb 2, also  
42 called VAMP2: vesicle-associated membrane protein 2), syntaxin-1 (Syx 1), and SNAP-25. The  
43 C-terminal single transmembrane domain (TMD) of Syb 2 anchored on the synaptic vesicles and the  
44 C-terminal single TMD of Syx 1 located in the plasma membrane. They winded with SNAP-25 and  
45 formed a 4-helical SNARE core structure (7). The extension of the zipper formation of core structure to  
46 membranes by these two single TMDs is the main driving force of membrane fusion (8). Most SNARE  
47 proteins contain a single TMD except for syntaxin 17 (Syx 17) that contains unique V-shape double  
48 TMDs and serves in the fusion process between autophagosomes and lysosomes (9, 10) (**Fig. S1**).  
49 Determining the influence of Syx 17 double TMDs in membrane fusion is important for the mechanistic  
50 understanding of fusion regulation.

51

52 Membrane fusion can be regulated by the physicochemical property of the lipids and the structure of  
53 SNAREs (1, 11-16). For instance, Katsov et al. (11) investigated how lipid compositions influences  
54 fusion process, suggesting that lipids with spontaneous negative curvature (e.g.  
55 phosphatidylethanolamine (PE) and cholesterol (CHOL)) have a lower energy barrier to accomplish  
56 fusion process. Furthermore, Jackson took into account the deformation and motion of the membrane  
57 and SNAREs TMDs into a theoretical model and showed the impact of TMD properties (e.g. TMDs'  
58 stiffness and numbers) on the fusion energy profile and fusion rate (13). To the best of our knowledge,

59 most previous studies focused on the membrane or the SNAREs individually, the influence of  
60 lipid-SNAREs interaction on the fusion process is still unclear.

61

62 When SNAREs, particularly those containing transmembrane domains (TMDs) (e.g. Syb and Syx),  
63 insert into the membrane, a hydrophobic mismatch can occur between the lipid bilayer and TMDs due to  
64 different size of the lipid bilayer thickness and the length of TMDs. Such a hydrophobic mismatch could  
65 tilt the insertion angle of the axis of TMDs depending on the TMD's length and membrane composition  
66 (17-19). Consequently, this hydrophobic mismatch can affect the structure of TMDs, change the local  
67 distribution of SNAREs, and even influence the fusion rate (20, 21). Motivated by these results, we  
68 reason that lipid-SNAREs interaction can exert critical effects on membrane fusion. To date, however,  
69 rare model includes the lipid-SNAREs interaction in the mechanistic study of membrane fusion.

70

71 To study the role of TMD in membrane fusion, we used a new approach of adding TMD, which is  
72 different with previous assay of removing TMD (22). Through ensemble lipid-mixing and single-vesicle  
73 docking assays, we showed that a double TMDs from Syx 17 reduced the fusion rate about 4 times  
74 compared to a single TMD domain from the wildtype Syx 1 (Syx 1 WT). To explain this difference, we  
75 determined the effect of lipid-SNAREs mismatch on the membrane fusion process by introducing a  
76 theoretical model that treats lipid-protein interaction explicitly. This model shows that increased  
77 lipid-SNAREs mismatch should slow down the fusion process, which is supported by the experimental  
78 result that double TMDs reduce the membrane fusion rate. Our results provide both theoretical and  
79 experimental frameworks for the mechanistic study of the regulatory roles of lipid-SNAREs interaction  
80 involved in the membrane fusion process.

81

## 82 MATERIALS AND METHODS

### 83 Protein preparation

84 All proteins were from rat and expressed and purified as described by (23-25). Briefly, his-tagged Syx 1  
85 WT, Syx 1/17 containing the cytoplasmic domain of Syx 1 and the double transmembrane domains of  
86 Sxy 17, Syb 2, and SNAP-25 were expressed in *E. coli* and purified using a combination of Ni-NTA  
87 affinity (Qiagen, Hilden, Germany) and size exclusion chromatography on a Superdex 200 column (GE  
88 Healthcare, Uppsala, Sweden). His-tags were removed with TEV protease.

89

### 90 Ensemble lipid mixing

91 A step-by-step protocol for SNARE protein purification and v-/t-SNARE vesicle reconstitution for lipid  
92 mixing experiments has been reported in our previous publication (26). The protein to lipid ratio was  
93 1:200 for both t-SNARE and v-SNARE vesicles, by which approximately 100-200 copies of SNARE  
94 proteins would be reconstituted to individual vesicles (27, 28). DiI-labeled t-SNARE vesicles and  
95 DiD-labeled v-SNARE vesicles were mixed at a molar ratio of 1:1. To demonstrate the activity of  
96 vesicle fusion via lipid mixing, we measured acceptor fluorescence intensity by FRET using a  
97 fluorescence spectrometer (Varian Cary). Wavelengths of 530 and 670 nm were used for excitation of  
98 donor (DiI) and emission of acceptor (DiD), respectively. All experiments were performed at 35 °C.

99

### 100 Single vesicle docking

101 A detailed protocol for this step has been previously described (29, 30). The PEGylated surface of the  
102 microfluidic chamber was incubated with neutravidin (Invitrogen) for 5 min and washed with buffer.  
103 The v-vesicles were immobilized on the surface with a 5-min incubation, and washed with buffer to  
104 remove free vesicles. Then, t-vesicles were injected and washed after 15 min of incubation. Docked

105 t-vesicles were excited by a 532-nm laser (Crystal laser) on a total internal reflection fluorescence  
106 microscopy (Nikon). The docking number per an imaging area ( $45 \times 90 \mu\text{m}^2$ ) was analyzed and  
107 averaged by using a customized program written in C++ (Microsoft).

108

## 109 **RESULTS**

110 To check the influence of double TMDs on fusion, we performed experiments to investigate how the  
111 hydrophobic mismatch changes the fusion rate. Firstly, the double TMDs of Syx 17 was hybridized with  
112 Syx 1 WT (named as Syx 1/17) to eliminate the residue sequences difference of their zipping domains.  
113 We then performed an ensemble lipid-mixing assay to study the influence of double TMDs on the fusion  
114 process (**Fig. 1A**) The fluorescence intensity produced by FRET between the donor and acceptor dyes in  
115 vesicles was measured for  $\sim 1800$  s (**Fig. 1B**). The same v-SNARE vesicles reconstituted with Syb 2  
116 were used for vesicles reconstituted with Syx 1 WT or Syx 1/17. During the whole course of fusion, the  
117 intensity of Syx 1 WT system is higher than that of Syx 1/17, indicating that the fusion rate of Syx 1 WT  
118 system is higher than that of Syx 1/17. By fitting the fluorescence intensity curve, we found that the  
119 fusion rate  $K$  of Syx 1 WT system is  $\sim 3.6$ - $4.1$  times as much as that of Syx 1/17. To eliminate the  
120 influence of double TMDs on vesicle docking, the rate-limiting step of ensemble experiments, we also  
121 performed the single-vesicle docking assay (**Fig. S2**). No difference on docking was observed (**Fig.**  
122 **S2B**), indicating that the reduced lipid mixing lies on the fusion step. Moreover, since the vesicle  
123 docking is induced by the interaction of SNARE domains, the result shown in **Fig. S2B** also implies the  
124 reconstituted level of t-SNARE proteins for Syx 1 WT and Syx 1/17 vesicles was similar and the fusion  
125 reduction was mainly caused by the difference of TMDs.

126

127 A theoretical model was introduced to investigate the influence of length mismatch between lipid  
128 thickness and TMDs on the membrane fusion. Three representative structures were used to capture the  
129 fusion process (**Fig. 2A**) (31). In the beginning state, the tilted TMDs of Syx and Syb formed bundles in  
130 the membrane respectively (**Fig. 2A**,  $\alpha$  state); with the zipping of SNARE core helical structure, the  
131 TMDs rotated and moved along with membrane deformation (**Fig. 2A**,  $\beta$  state); after SNARE zipping  
132 finished, two opposed membranes merged and a fusion pore formed, the TMDs of Syx and Syb came to  
133 close contact (**Fig. 2A**,  $\gamma$  state). In our theoretical model, we described the fusion process with a  
134 reaction coordinate  $d$ , the distance between the tails of transmembrane domain, as shown in the state  
135  $\beta$  of **Fig. 2A**. This distance stays at its minimum,  $d_{\min}$ , before fusion begins at the state  $\alpha$ . The  
136 distance reaches its maximum,  $d_{\max} = 2b$ , after fusion completes at the state of  $\gamma$ , where  $b$  is the  
137 length of TMDs. Because  $d$  monotonically increases from  $\alpha$  to  $\gamma$  state, we could use a  
138 dimensionless parameter,  $\xi(d) = (d - d_{\min}) / (d_{\max} - d_{\min})$ , to describe the fusion process. Note that  
139  $\xi(d) = 0$  at state  $\alpha$  and  $\xi(d) = 1$  at state  $\gamma$ .

140 The energy involved the fusion process was divided into three parts

$$141 \quad E = E_t + E_{\text{Zipping}} + E_{\text{pore}} \quad (1)$$

142 in which  $E_t$  is the energy contribution of lipid-protein mismatch;  $E_{\text{Zipping}}$  is the releasing energy by  
143 SNARE zipping; and  $E_{\text{pore}}$  is the energy cost of the membrane deformation to form a fusion pore. As  
144 described by previous studies, a mismatch may exist between the thickness of the membrane and the  
145 length of TMDs, which will tilt TMDs in the membrane after their insertion (17-19). For TMDs with  
146 lipid-protein mismatch, some hydrophobic region will extend out of membrane if the TMDs were to  
147 insert into the membrane vertically (**Fig. 2B**) and increase the interfacial energy of the extruded region.  
148 Thus, the TMDs prefer to insert into the membrane with a tilt angle  $\theta_t$  to bury all the hydrophobic area

149 (**Fig. 2B**). Accordingly, the total interfacial energy varies with the tilt angle  $\theta_t$ . Here, we assume that  
150 the tile angle  $\theta_t$  changes linearly during TMD insertion into membrane during the fusion process, in  
151 which case, the tilt energy becomes

$$152 \quad E_t = N_t E_{t0} \xi(d) \quad (2)$$

153 where  $N_t$  is the number of TMDs involving in the fusion process. For single SNARE,  $N_t = 2$  (TMD  
154 from Syx1 WT and Syb). For two SNAREs,  $N_t = 4$  etc..  $E_{t0}$  is the tilt energy for one TMD change  
155 during the fusion process. The length of TMD and membrane composition can significantly influence  
156 the suitable tilt angle and energy profile (17, 19). According to previous studies (18, 19), the energy  
157 barrier,  $E_{t0} \approx 4.6 - 6.1 k_B T$  for tilt energy changes from the minimum to the maximum. As shown in **Fig.**  
158 **2C**, when the fusion process finishes and Syx comes to close contact with Syb, both the TMDs insert in  
159 the membrane with a residual tilt angle  $\theta_{t0}$  due to the radius of TMDs (**Fig. 2C**). The radius of  
160 membrane contour curvature  $R_m$  (**Fig. 2C**) was estimated in a range of 3-10 nm based on previous  
161 simulations and experiment results (13, 32-36), the radius of TMDs is  $r = 0.35 \text{ nm}$  (13). Therefore, the  
162 residual tilt angle after the fusion process finishes can be calculated  $\theta_{t0} = \arcsin(r/R_m)$  (**Fig. 2C**), and  
163  $\theta_{t0}$  comes to  $\sim 2.0 - 6.7^\circ$ . As a result, the tilt energy changes during fusion process from  $\alpha$  to  $\gamma$   
164 state  $E_{t0} \approx 2.7 - 4.7 k_B T$  (18, 19).

165

166 The energy of each SNARE released during the fusion process is  $E_0^{SNARE} = 35 k_B T$  (37).  $E_{zipping}$  is the  
167 energy of SNAREs zipping which are assumed to be linear with the normalized fusion process

$$168 \quad E_{zipping} = N \cdot E_0^{SNARE} \cdot \frac{d - d_{\min}}{d_{\max} - d_{\min}} \quad (3)$$



169 Finally,  $E_{pore}$  is the energy cost to form a fusion pore on the membrane during the fusion process. This  
 170 energy profile changes with the fusion process and could be fit by a Gauss function with an energy  
 171 barrier of  $E_0^{pore} = 34.3k_B T$  (38). The maximum energy barrier was assumed to be located in the middle  
 172 of the fusion process

$$173 \quad E_{pore} = y_0 + E_0^{pore} e^{-\frac{[d-(d_{min}+d_{max})/2]^2}{2\omega^2}} \quad (4)$$

174 The parameters used in this study were listed in **Table 1**.

175

176 To calculate the fusion rate, according to the Kramers' theory (13, 39, 40), the reaction rate  $k$  can be  
 177 written as

$$178 \quad k = \frac{\sqrt{\phi_{well} \cdot \phi_{barrier}}}{f} e^{-\Delta E/k_B T} \quad (5)$$

179 where  $\Delta E$  is the energy barrier of the reaction.  $\phi_{well}$  and  $\phi_{barrier}$  are the quadratic coefficients for the  
 180 energy profile at the minimum and at the peak of the barrier, respectively.  $f$  is a constant related to the  
 181 diffusion coefficient.  $k_B$  is the Boltzmann constant, and  $T$  is the absolute temperature. Finally, we got  
 182 the fusion rate ratio between two reactions of  $i$  and  $j$

$$183 \quad \frac{k_i}{k_j} = \frac{\sqrt{\phi_{well}^i \cdot \phi_{barrier}^i}}{\sqrt{\phi_{well}^j \cdot \phi_{barrier}^j}} e^{-\frac{(\Delta E^i - \Delta E^j)}{k_B T}} \quad (6)$$

184

185 The total energy profiles during membrane fusion were calculated with different number of SNAREs.  
 186 The energy profiles and energy barrier for  $N = 1-3$  were shown in **Fig. 3A**. The energy barriers decrease  
 187 with an increasing number of SNAREs taking part in the fusion process. When three or more SNAREs  
 188 were involved in the fusion process, the energy barrier during the fusion process nearly vanished (see

189 **Fig. 3A**). As a result, fusion will finish rapidly, which is consistent with the previous study that efficient  
190 fusion requires three or more SNARE complexes (41).

191

192 To investigate the influence of hydrophobic mismatch between the lipid bilayer and TMDs on the fusion  
193 process, we calculate the energy profile with and without hydrophobic mismatch with two SNAREs  
194 during fusion. Compared with fusion process without hydrophobic mismatch, the energy barrier of  
195 fusion process with hydrophobic mismatch is  $\sim 2.8k_B T$  higher (**Fig. 3B**). At the beginning of fusion  
196 with hydrophobic mismatch, the TMDs are tilted in the membrane (see  $\alpha$  state in **Fig. 2A**). After the  
197 formation of fusion pore, the TMDs of Syb and Syx contact with each other and will be almost  
198 perpendicular to the membrane (see  $\gamma$  state in **Fig. 2A** and **Fig. 2C**). The energy profile changes and  
199 the energy barrier increases if the lipid-protein mismatch was involved. Thus, the fusion process with  
200 hydrophobic mismatch experiences a higher energy barrier and leads to a slower fusion rate.

201

202 To analyze our experimental results in **Fig. 1**, we investigated the influence of double TMDs with our  
203 theoretical model. The tilt energy change during the fusion process with double TMDs is larger than that  
204 of single TMD, which was mainly due to larger TMD numbers  $N_t$ . The calculated difference between  
205 single TMD and double TMDs is shown in **Fig. S3**. The energy profile during the fusion process is  
206 shown in **Fig. 4A**. When two SNAREs take part in the fusion process, the double TMDs increases the  
207 fusion energy barrier and reduces fusion rate. The energy barrier of Syx 1/17 is  $\sim 1.53k_B T$  higher than  
208 that of Syx 1 WT, so that the fusion rate of Syx1 WT is  $\sim 4.6$  times higher than that of Syx 1/17,  
209 consistent with the experimental result (**Fig. 1B**). Both our experimental and theoretical results showed  
210 that double TMDs reduce fusion rate significantly, which could explain why the fusion process of  
211 autophagosomes and lysosomes is slower than the fusion during neurotransmission (22, 42).

212

213 Considering the hydrophobic mismatch effect, we predict that, when 1-3 SNAREs were involved in the  
214 fusion process, the fusion rate of Syx 1 WT can be ~1.8-4.9 times higher than that of Syx 1/17 (**Fig. 4B**).  
215 The FRET experiment showed that the fusion rate of Syx 1 WT system is ~3.6-4.1 times higher than that  
216 of Syx 1/17. Since we used the physiological relevant level of lipids and proteins (43), our results  
217 indicate that the number of SNAREs involved in a general fusion process is likely to be 2 to 3 (see **Fig.**  
218 **4B**).

219

## 220 **DISCUSSION**

221 The interplay between protein and membrane is essential for inducing and regulating membrane fusion  
222 (44). As the direct link between SNAREs and membrane, TMD stays the center of biophysical and  
223 biochemical researches of SNARE-mediated membrane fusion (45), especially for fusion pore opening  
224 (46). Previously, the TMD interaction of multiple Syx 1 proteins has been proposed for fusion pore  
225 opening (47). However, replacing the single TMD of Syx 1 with a lipid anchor showed no effect on  
226 synaptic transmission (22). To solve this issue, we studied how the hydrophobic mismatch between the  
227 membrane and TMD affects the fusion process by theoretical modeling and in vitro reconstitution  
228 experiments. The uniqueness of our study is adding an extra TMD to increase lipid-protein mismatch,  
229 instead of deleting TMD. Both of our theoretical and experimental results showed that the hydrophobic  
230 mismatch effect between the thickness of the membrane and the length of TMDs reduces the fusion rate.

231

232 Moreover, our theoretical modeling not only explains the role of double TMDs in reducing fusion rate  
233 but also reveals the number of SNAREs involved in fusion. The SNARE number involved in a fusion  
234 process is a hotspot in the fusion related researches (13, 41, 48-51), controversy still exists and the

235 proposed number range from one to some dozens (49). For example, some studies proposed that more  
236 than a dozen of SNAREs were needed for fusion (48, 49). In contrast, it was also proposed that only a  
237 small number of SNAREs can complete the fusion process (41, 50, 51). For example, Bogaart et al.  
238 proposed that only one SNARE could lead to fusion (50), while some experimental results showed that  
239 one to three SNAREs are sufficient for completing the membrane fusion (41, 51). Our results showed  
240 that 2-3 SNAREs are involved in a general fusion process, which is consistent with previous studies (41,  
241 49-51).

242

#### 243 Author Contributions

244 D.L., B.J., and J.D. contributed to concept and design of this study. B.B. and D.L. performed theoretic  
245 calculation. Z.T. performed and analyzed data for fusion and docking experiments. B.B., D.L., K.Z. B.J.,  
246 and J.D. wrote manuscript.

247

#### 248 Acknowledgments

249 The authors would like to thank M. Padolina for protein preparation. B.B., D.L., and B.J. were supported  
250 by funds from the National Natural Science Foundation of China (NSFC 11932017, 11772054,  
251 11772055, 11532009, and 11902051). D.L. was supported by the Fundamental Research Funds for the  
252 Central Universities (Grant No. 2019QNA4060). K.Z. was supported by the School of Molecular Cell  
253 Biology at the University of Illinois at Urbana-Champaign. J.D. was supported by the NIH  
254 (R35GM128837).

255 **References**

256

- 257 1. Chernomordik, L. V., and M. M. Kozlov. 2008. Mechanics of membrane fusion. *Nat*  
258 *Struct Mol Biol* 15(7):675-683.
- 259 2. Cho, S., and H. von Gersdorff. 2013. Neuroscience: Faster than kiss-and-run. *Nature*  
260 504(7479):220-221.
- 261 3. Fuhrmans, M., G. Marelli, Y. G. Smirnova, and M. Muller. 2015. Mechanics of  
262 membrane fusion/pore formation. *Chem Phys Lipids* 185:109-128.
- 263 4. Jahn, R., and R. H. Scheller. 2006. SNAREs--engines for membrane fusion. *Nat Rev*  
264 *Mol Cell Biol* 7(9):631-643.
- 265 5. Chen, Y. A., and R. H. Scheller. 2001. SNARE-mediated membrane fusion. *Nat Rev*  
266 *Mol Cell Biol* 2(2):98-106.
- 267 6. Wang, Y., L. Li, C. Hou, Y. Lai, J. Long, J. Liu, Q. Zhong, and J. Diao. 2016.  
268 SNARE-mediated membrane fusion in autophagy. *Semin Cell Dev Biol* 60:97-104.
- 269 7. Sutton, R. B., D. Fasshauer, R. Jahn, and A. T. Brunger. 1998. Crystal structure of a  
270 SNARE complex involved in synaptic exocytosis at 2.4 angstrom resolution. *Nature*  
271 395(6700):347-353.
- 272 8. Stein, A., G. Weber, M. C. Wahl, and R. Jahn. 2009. Helical extension of the neuronal  
273 SNARE complex into the membrane. *Nature* 460(7254):525-528.
- 274 9. Itakura, E., C. Kishi-Itakura, and N. Mizushima. 2012. The hairpin-type tail-anchored  
275 SNARE syntaxin 17 targets to autophagosomes for fusion with endosomes/lysosomes. *Cell*  
276 151(6):1256-1269.
- 277 10. Itakura, E., and N. Mizushima. 2013. Syntaxin 17: the autophagosomal SNARE.  
278 *Autophagy* 9(6):917-919.
- 279 11. Katsov, K., M. Muller, and M. Schick. 2004. Field theoretic study of bilayer membrane  
280 fusion. I. Hemifusion mechanism. *Biophys J* 87(5):3277-3290.
- 281 12. Jackson, M. B. 2009. Minimum membrane bending energies of fusion pores. *J Membr*  
282 *Biol* 231(2-3):101-115.
- 283 13. Jackson, M. B. 2010. SNARE complex zipping as a driving force in the dilation of  
284 proteinaceous fusion pores. *J Membr Biol* 235(2):89-100.
- 285 14. Ryham, R. J., T. S. Klotz, L. Yao, and F. S. Cohen. 2016. Calculating Transition Energy  
286 Barriers and Characterizing Activation States for Steps of Fusion. *Biophys J* 110(5):1110-1124.
- 287 15. Mostafavi, H., S. Thiyagarajan, B. S. Stratton, E. Karatekin, J. M. Warner, J. E.  
288 Rothman, and B. O'Shaughnessy. 2017. Entropic forces drive self-organization and membrane  
289 fusion by SNARE proteins. *Proc Natl Acad Sci U S A* 114(21):5455-5460.
- 290 16. Bu, B., Z. Tian, D. Li, and B. Ji. 2016. High Transmembrane Voltage Raised by Close  
291 Contact Initiates Fusion Pore. *Front Mol Neurosci* 9:136.
- 292 17. Strandberg, E., S. Esteban-Martin, A. S. Ulrich, and J. Salgado. 2012. Hydrophobic

- 293 mismatch of mobile transmembrane helices: Merging theory and experiments. *Biochim Biophys*  
294 *Acta* 1818(5):1242-1249.
- 295 18. Lee, J., and W. Im. 2008. Transmembrane helix tilting: insights from calculating the  
296 potential of mean force. *Phys Rev Lett* 100(1):018103.
- 297 19. Kim, T., and W. Im. 2010. Revisiting hydrophobic mismatch with free energy  
298 simulation studies of transmembrane helix tilt and rotation. *Biophys J* 99(1):175-183.
- 299 20. Milovanovic, D., A. Honigmann, S. Koike, F. Gottfert, G. Pahler, M. Junius, S. Mullar,  
300 U. Diederichsen, A. Janshoff, H. Grubmuller, H. J. Risselada, C. Eggeling, S. W. Hell, G. van  
301 den Bogaart, and R. Jahn. 2015. Hydrophobic mismatch sorts SNARE proteins into distinct  
302 membrane domains. *Nat Commun* 6:5984.
- 303 21. Killian, J. A. 1998. Hydrophobic mismatch between proteins and lipids in membranes.  
304 *Bba-Rev Biomembranes* 1376(3):401-416.
- 305 22. Zhou, P., T. Bacaj, X. Yang, Z. P. Pang, and T. C. Sudhof. 2013. Lipid-anchored  
306 SNAREs lacking transmembrane regions fully support membrane fusion during neurotransmitter  
307 release. *Neuron* 80(2):470-483.
- 308 23. Gong, J., Y. Lai, X. Li, M. Wang, J. Leitz, Y. Hu, Y. Zhang, U. B. Choi, D. Cipriano, R.  
309 A. Pfuetzner, T. C. Sudhof, X. Yang, A. T. Brunger, and J. Diao. 2016. C-terminal domain of  
310 mammalian complexin-1 localizes to highly curved membranes. *Proc Natl Acad Sci U S A*  
311 113(47):E7590-E7599.
- 312 24. Lai, Y., U. B. Choi, Y. Zhang, M. Zhao, R. A. Pfuetzner, A. L. Wang, J. Diao, and A. T.  
313 Brunger. 2016. N-terminal domain of complexin independently activates calcium-triggered  
314 fusion. *Proc Natl Acad Sci U S A* 113(32):E4698-4707.
- 315 25. Lai, Y., J. Diao, D. J. Cipriano, Y. Zhang, R. A. Pfuetzner, M. S. Padolina, and A. T.  
316 Brunger. 2014. Complexin inhibits spontaneous release and synchronizes Ca<sup>2+</sup>-triggered  
317 synaptic vesicle fusion by distinct mechanisms. *eLife* 3:e03756.
- 318 26. Diao, J., L. Li, Y. Lai, and Q. Zhong. 2017. In Vitro Reconstitution of  
319 Autophagosome-Lysosome Fusion. *Methods Enzymol* 587:365-376.
- 320 27. Diao, J., Y. Ishitsuka, H. Lee, C. Joo, Z. L. Su, S. Syed, Y. K. Shin, T. Y. Yoon, and T.  
321 Ha. 2012. A single vesicle-vesicle fusion assay for in vitro studies of SNAREs and accessory  
322 proteins. *Nature Protocols* 7(5):921-934.
- 323 28. Kyoung, M. J., Y. X. Zhang, J. J. Diao, S. Chu, and A. T. Brunger. 2013. Studying  
324 calcium-triggered vesicle fusion in a single vesicle-vesicle content and lipid-mixing system.  
325 *Nature Protocols* 8(1):1-16.
- 326 29. Diao, J., D. J. Cipriano, M. Zhao, Y. Zhang, S. Shah, M. S. Padolina, R. A. Pfuetzner,  
327 and A. T. Brunger. 2013. Complexin-1 enhances the on-rate of vesicle docking via simultaneous  
328 SNARE and membrane interactions. *J Am Chem Soc* 135(41):15274-15277.
- 329 30. Diao, J., T. Y. Yoon, Z. Su, Y. K. Shin, and T. Ha. 2009. C2AB: a molecular glue for  
330 lipid vesicles with a negatively charged surface. *Langmuir : the ACS journal of surfaces and*  
331 *colloids* 25(13):7177-7180.

- 332 31. Han, J., K. Pluhackova, and R. A. Bockmann. 2017. The Multifaceted Role of SNARE  
333 Proteins in Membrane Fusion. *Front Physiol* 8:5.
- 334 32. Diao, J., P. Grob, D. J. Cipriano, M. Kyoung, Y. Zhang, S. Shah, A. Nguyen, M.  
335 Padolina, A. Srivastava, M. Vrljic, A. Shah, E. Nogales, S. Chu, and A. T. Brunger. 2012.  
336 Synaptic proteins promote calcium-triggered fast transition from point contact to full fusion.  
337 *eLife* 1:e00109.
- 338 33. Bu, B., M. Crowe, J. Diao, B. Ji, and D. Li. 2018. Cholesterol suppresses membrane  
339 leakage by decreasing water penetrability. *Soft Matter* 14(25):5277-5282.
- 340 34. Tsai, H. H., C. M. Chang, and J. B. Lee. 2014. Multi-step formation of a hemifusion  
341 diaphragm for vesicle fusion revealed by all-atom molecular dynamics simulations. *Biochim*  
342 *Biophys Acta* 1838(6):1529-1535.
- 343 35. Kawamoto, S., M. L. Klein, and W. Shinoda. 2015. Coarse-grained molecular  
344 dynamics study of membrane fusion: Curvature effects on free energy barriers along the stalk  
345 mechanism. *J Chem Phys* 143(24):243112.
- 346 36. Lai, Y., L. Zhao, B. Bu, X. Lou, D. Li, B. Ji, J. Liu, J. Diao, and Y. K. Shin. 2015. Lipid  
347 molecules influence early stages of yeast SNARE-mediated membrane fusion. *Phys Biol*  
348 12(2):025003.
- 349 37. Li, F., F. Pincet, E. Perez, W. S. Eng, T. J. Melia, J. E. Rothman, and D. Tareste. 2007.  
350 Energetics and dynamics of SNAREpin folding across lipid bilayers. *Nat Struct Mol Biol*  
351 14(10):890-896. Article.
- 352 38. Francois-Martin, C., J. E. Rothman, and F. Pincet. 2017. Low energy cost for optimal  
353 speed and control of membrane fusion. *Proc Natl Acad Sci U S A* 114(6):1238-1241.
- 354 39. Hänggi, P., P. Talkner, and M. Borkovec. 1990. Reaction-rate theory: fifty years after  
355 Kramers. *Reviews of Modern Physics* 62(2):251-341.
- 356 40. Kramers, H. A. 1940. Brownian motion in a field of force and the diffusion model of  
357 chemical reactions. *Physica* 7(4):284-304.
- 358 41. Shi, L., Q. T. Shen, A. Kiel, J. Wang, H. W. Wang, T. J. Melia, J. E. Rothman, and F.  
359 Pincet. 2012. SNARE proteins: one to fuse and three to keep the nascent fusion pore open.  
360 *Science* 335(6074):1355-1359. Research Support, Non-U.S. Gov't.
- 361 42. Watanabe, S., B. R. Rost, M. Camacho-Perez, M. W. Davis, B. Sohl-Kielczynski, C.  
362 Rosenmund, and E. M. Jorgensen. 2013. Ultrafast endocytosis at mouse hippocampal synapses.  
363 *Nature* 504(7479):242-247.
- 364 43. Takamori, S., M. Holt, K. Stenius, E. A. Lemke, M. Gronborg, D. Riedel, H. Urlaub, S.  
365 Schenck, B. Brugger, P. Ringler, S. A. Muller, B. Rammner, F. Grater, J. S. Hub, B. L. De Groot,  
366 G. Mieskes, Y. Moriyama, J. Klingauf, H. Grubmuller, J. Heuser, F. Wieland, and R. Jahn. 2006.  
367 Molecular anatomy of a trafficking organelle. *Cell* 127(4):831-846.
- 368 44. van den Bogaart, G., K. Meyenberg, H. J. Risselada, H. Amin, K. I. Willig, B. E.  
369 Hubrich, M. Dier, S. W. Hell, H. Grubmuller, U. Diederichsen, and R. Jahn. 2011. Membrane  
370 protein sequestering by ionic protein-lipid interactions. *Nature* 479(7374):552-555.



- 371 45. Tian, Z., J. Gong, M. Crowe, M. Lei, D. Li, B. Ji, and J. Diao. 2019. Biochemical  
372 studies of membrane fusion at the single-particle level. *Prog Lipid Res* 73(1):92-100.
- 373 46. Bao, H., D. Das, N. A. Courtney, Y. Jiang, J. S. Briguglio, X. Lou, D. Roston, Q. Cui,  
374 B. Chanda, and E. R. Chapman. 2018. Dynamics and number of trans-SNARE complexes  
375 determine nascent fusion pore properties. *Nature* 554(7691):260-263.
- 376 47. Han, X., C. T. Wang, J. Bai, E. R. Chapman, and M. B. Jackson. 2004. Transmembrane  
377 segments of syntaxin line the fusion pore of Ca<sup>2+</sup>-triggered exocytosis. *Science*  
378 304(5668):289-292.
- 379 48. Karatekin, E., J. Di Giovanni, C. Iborra, J. Coleman, B. O'Shaughnessy, M. Seagar,  
380 and J. E. Rothman. 2010. A fast, single-vesicle fusion assay mimics physiological SNARE  
381 requirements. *Proc Natl Acad Sci U S A* 107(8):3517-3521.
- 382 49. Xu, W., B. Nathwani, C. Lin, J. Wang, E. Karatekin, F. Pincet, W. Shih, and J. E.  
383 Rothman. 2016. A Programmable DNA Origami Platform to Organize SNAREs for Membrane  
384 Fusion. *J Am Chem Soc* 138(13):4439-4447.
- 385 50. van den Bogaart, G., M. G. Holt, G. Bunt, D. Riedel, F. S. Wouters, and R. Jahn. 2010.  
386 One SNARE complex is sufficient for membrane fusion. *Nat Struct Mol Biol* 17(3):358-364.
- 387 51. Sinha, R., S. Ahmed, R. Jahn, and J. Klingauf. 2011. Two synaptobrevin molecules are  
388 sufficient for vesicle fusion in central nervous system synapses. *Proc Natl Acad Sci U S A*  
389 108(34):14318-14323.
- 390
- 391



392 **Table 1.** The definitions and parameters for the theoretical model.

| Symbol       | Definition                                | Values                 | Ref               |
|--------------|-------------------------------------------|------------------------|-------------------|
| $N$          | Number of SNARE complexes                 | 1-3                    | (41)              |
| $r$          | Radius of TMDs                            | $3.5 \text{ \AA}$      | (13)              |
| $R_m$        | Radius of membrane contour curvature      | 3-10nm                 | (13, 32-35)       |
| $E_{t0}$     | Tilt energy change during fusion process  | $\sim 2.7 - 4.7 k_B T$ | (18, 19)          |
| $E_b^{pore}$ | Energy to generate a membrane fusion pore | $34.3 k_B T$           | (38)              |
| $y_0$        | Gauss curvature parameter                 | $-1.01 k_B T$          | Fitting with (38) |
| $E_0^{pore}$ | Gauss curvature parameter                 | $35.3 k_B T$           | Fitting with (38) |
| $\omega$     | Gauss curvature parameter                 | 0.188nm                | Fitting with (38) |
| $E_{SNARE}$  | Energy provided by one SNARE protein      | $35 k_B T$             | (37)              |

393

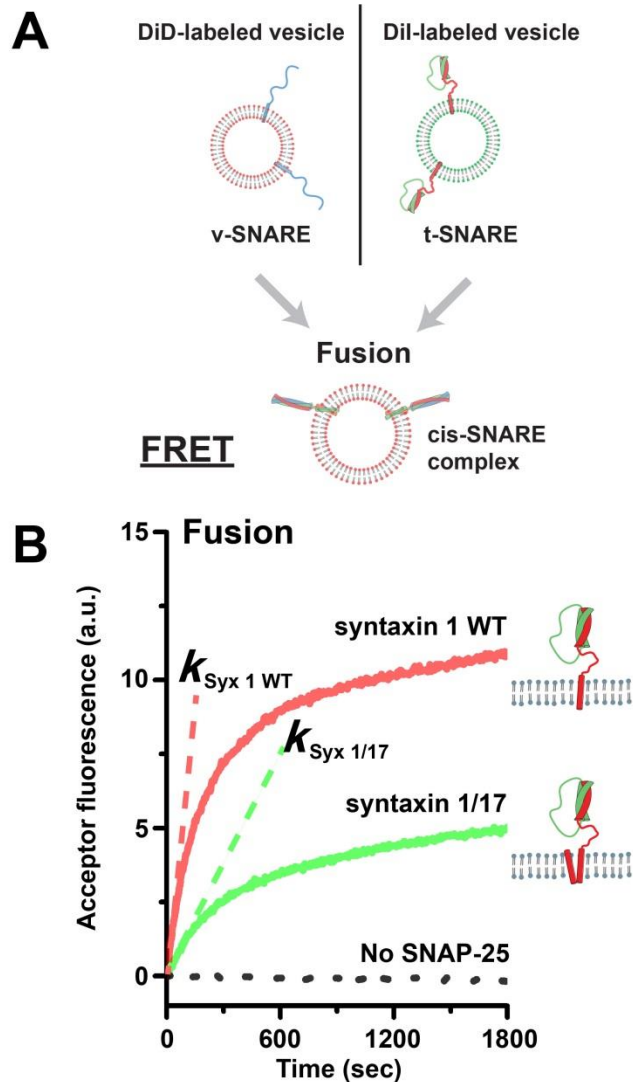

394

395 **Figure 1.** The double TMDs reduces fusion rate in vitro. (A) The illustration of v-vesicles and t-vesicles  
396 fusion. (B) Fusion of v-vesicles and t-vesicles reconstituted with syntaxin 1 wild-type (Syx 1 WT) or  
397 syntaxin 1 hybridized to a double TMDs of syntaxin 17 (Syx 1/17). The y axis is acceptor fluorescence  
398 intensity produced by FRET between the donor and acceptor dyes in vesicles, a measure of the activity  
399 of vesicle fusion with lipid mixing.

400

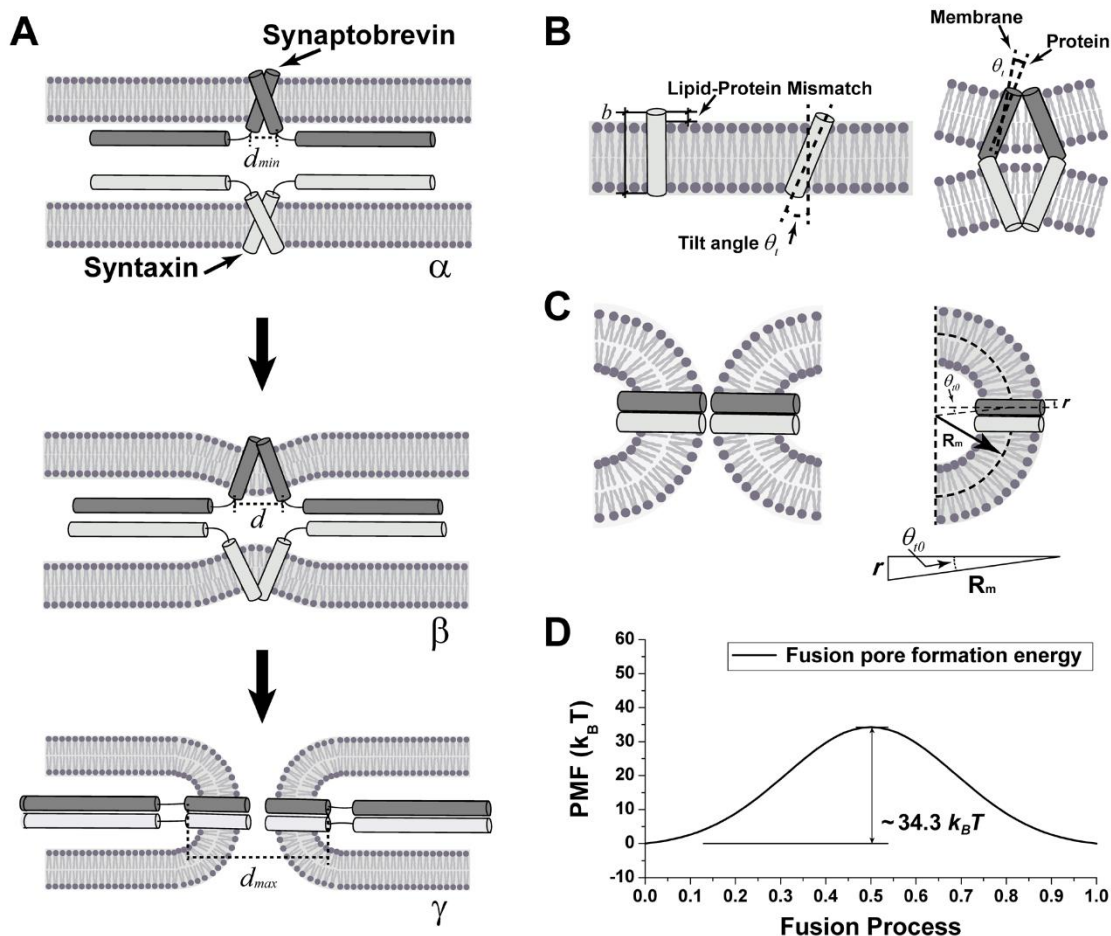

401  
 402 **Figure 2.** The fusion process with lipid-protein hydrophobic mismatch. (A) The representative structures  
 403 of transition process from protein anchored in the membrane to fusion pore formation. TMDs rotated  
 404 and moved, membrane deformed with fusion process from  $\alpha$  to  $\gamma$ .  $d$ ,  $d_{min}$ , and  $d_{max}$  is the  
 405 distance between the transmembrane domain's tails at different states, respectively. (B) The illustration  
 406 of  $E_t$  energy contribution.  $E_t$  is the energy which represent the TMDs tilt (lipid-protein hydrophobic  
 407 mismatch).  $b$  is the length of TMDs.  $\theta_t$  is the tilt angle, which is the angle between the direction of  
 408 TMDs and normal direction of membrane. (C) Illustration of lipid-protein mismatch interface in  $\gamma$   
 409 state.  $\theta_{t0}$  is the residual tilt angle when the fusion process finished.  $R_m$  is the radius of membrane  
 410 contour curvature.  $r$  is the radius of TMD. The residual tilt angle  $\theta_{t0}$  can be calculated as  
 411  $\theta_{t0} = \arcsin(r/R_m)$ . (D) The profile of fusion pore formation energy  $E_{pore}$  as a function of the fusion  
 412 process was set as a Gauss curvature (38).

413

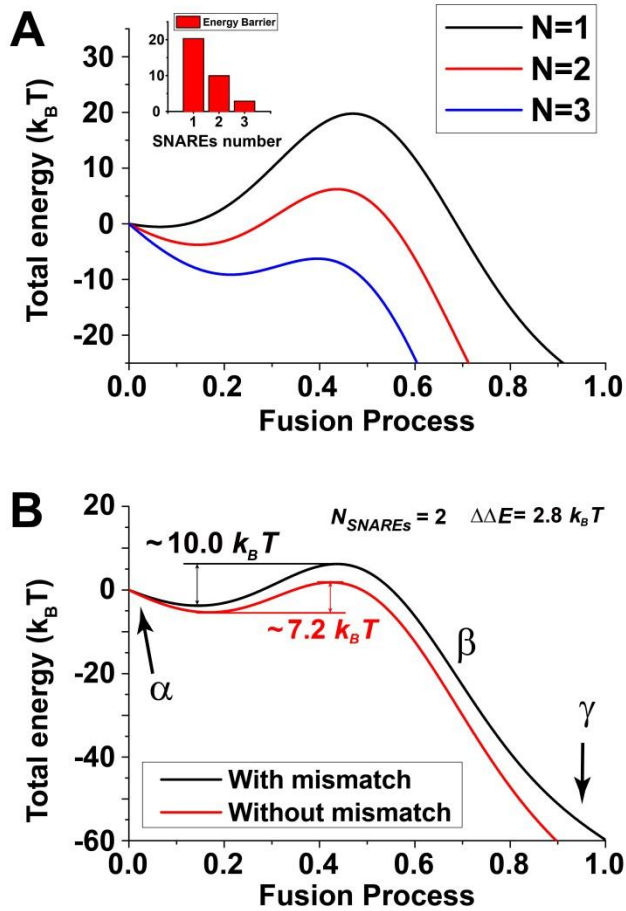

414

415 **Figure 3.** (A) The fusion energy profiles and barrier changed with different SNAREs number. (B) The

416 energy profile of fusion process with and without mismatch as a function of fusion process. Two

417 SNAREs were assumed to take part in the fusion process.

418

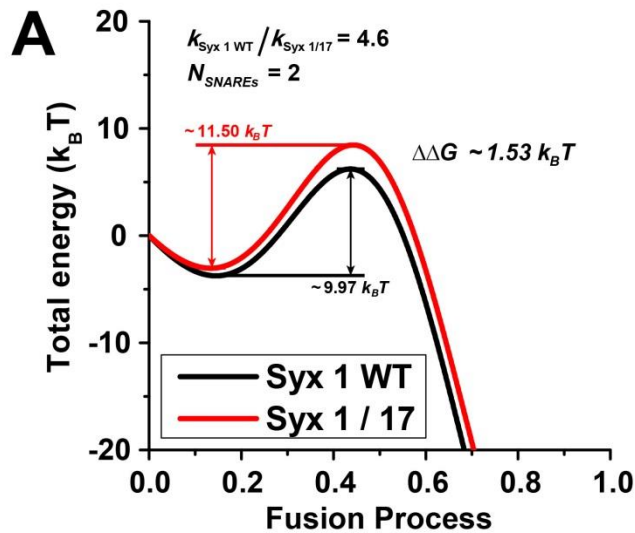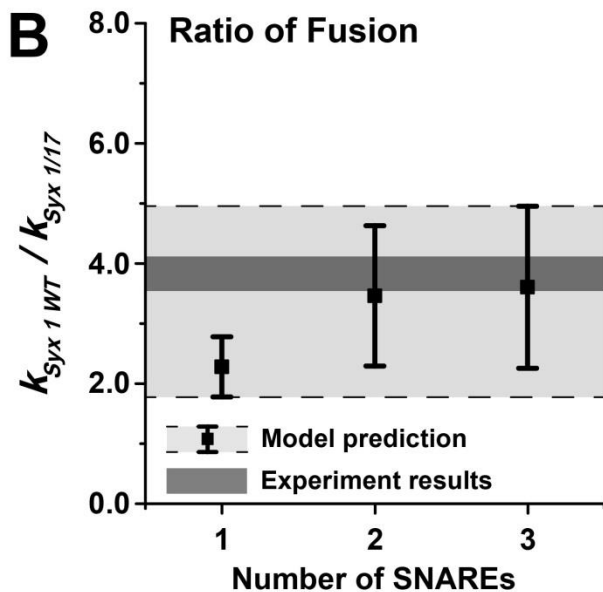

419

420 **Figure 4.** Theoretic analysis of fusion for Syx 1 WT and Syx 1/17. (A) The energy profiles of Syx 1 WT  
 421 and Syx 1/17 as function of fusion process. Two SNAREs were assumed to take part in the fusion  
 422 process. (B) The ratio of fusion velocity between Syx 1 WT and Syx 1/17 with various SNAREs number  
 423 predicted by the theoretical model was compared with the experiment results. The light grey shadow  
 424 region represented that tilt energy  $E_{i0}$  varies from  $2.7$  to  $4.7 k_B T$  and SNAREs number varies from 1  
 425 to 3.
